# Supplementary material
Source: PubMed Central journal article supplement (PMC4391766)
Supplement: supp_the2014-0361_Supplemental_TableS1.pdf [file supp_the2014-0361_Supplemental_TableS1.pdf]

Supplemental Table for:  
Age-stratified risk of unexpected uterine sarcoma following surgery for presumed benign leiomyoma  
Andrew Brohl et al.

**Table S1.** ICD-9 diagnosis codes used to identify potential cases of uterine sarcoma

| Code  | Description                                                                                  |
|-------|----------------------------------------------------------------------------------------------|
| 158   | Malignant Neoplasm of retroperitoneum and peritoneum                                         |
| 158.0 | Retroperitoneum                                                                              |
| 158.8 | Specified parts of peritoneum                                                                |
| 158.9 | Peritoneum, unspecified                                                                      |
| 159   | Malignant Neoplasm of other and ill-defined sites within the digestive organs and peritoneum |
| 159.0 | Intestinal tract, part unspecified                                                           |
| 159.8 | Other sites of digestive system and intra-abdominal organs                                   |
| 159.9 | Ill-defined                                                                                  |
| 171   | Malignant neoplasm of connective and other soft tissue                                       |
| 171.5 | Abdomen                                                                                      |
| 171.6 | Pelvis                                                                                       |
| 171.8 | Other specified sites of connective and other soft tissue                                    |
| 171.9 | Connective and other soft tissue, site unspecified                                           |
| 179   | Malignant neoplasm of uterus, part unspecified                                               |
| 180   | Malignant neoplasm of cervix uteri                                                           |
| 180.0 | Endocervix                                                                                   |
| 180.1 | Exocervix                                                                                    |
| 180.2 | Other specified sites of cervix                                                              |
| 180.9 | Cervix uteri, unspecified                                                                    |
| 182   | Malignant neoplasm of uterus                                                                 |
| 182.0 | Corpus uteri, except isthmus                                                                 |
| 182.1 | Isthmus                                                                                      |
| 182.8 | Other specified sites of body of uterus                                                      |
| 183   | Malignant neoplasm of ovary and other uterine adnexa                                         |
| 183.0 | Ovary                                                                                        |
| 183.2 | Fallopian tube                                                                               |
| 183.3 | Broad ligament                                                                               |
| 183.4 | Parametrium                                                                                  |
| 183.5 | Round ligament                                                                               |
| 183.8 | Other specified sites of uterine adnexa                                                      |
| 183.9 | Uterine adnexa, unspecified                                                                  |
| 184   | Malignant neoplasm of other and unspecified female genital organs                            |
| 184.0 | Vagina                                                                                       |
| 184.1 | Labia majora                                                                                 |

|        |                                                       |
|--------|-------------------------------------------------------|
| 184.2  | Labia minora                                          |
| 184.3  | Clitoris                                              |
| 184.4  | Vulva, unspecified                                    |
| 184.8  | Other specified sites of female genital organs        |
| 184.9  | Female genital organ, site unspecified                |
| 195    | Malignant neoplasms of other and unspecified sites    |
| 195.2  | Abdomen                                               |
| 195.3  | Pelvis                                                |
| 195.8  | Other specified sites                                 |
| 198    | Secondary malignant neoplasm of other specified sites |
| 198.6  | Ovary                                                 |
| 198.82 | Genital organs                                        |
| 198.89 | Other                                                 |
| 199    | Malignant neoplasm without specification of site      |
| 199.0  | Disseminated                                          |
| 199.1  | Other                                                 |
